# Supplementary material for: Realization of high thermoelectric performance in solution-synthesized porous Zn and Ga codoped SnSe nanosheets
Source: Royal Society of Chemistry journal article supplement (doi:10.1039/d2ta03079a), 2022-01-01
Supplement: d2ta03079a1.pdf [file d2ta03079a1.pdf]

## Supporting Information

### Realization of High Thermoelectric Performance in Solution Synthesized Porous Zn and Ga codoped SnSe Nanosheets

Shuang Li<sup>a</sup>, Yunxiang Hou<sup>a</sup>, Di Li<sup>b</sup>, Bo Zou<sup>a</sup>, Qingtang Zhang<sup>a</sup>, Yang Cao<sup>c</sup>, Guodong  
Tang<sup>a,\*</sup>

<sup>a</sup>*MIT Key Laboratory of Advanced Metallic and Intermetallic Materials Technology,  
School of Materials Science and Engineering, Nanjing University of Science and  
Technology, Nanjing 210094, P. R. China*

<sup>b</sup>*Key Laboratory of Materials Physics, Institute of Solid State Physics, Chinese Academy  
of Sciences, Hefei 230031, P. R. China*

<sup>c</sup>*School of Materials Science and Engineering, Nanjing University of Science and  
Technology, Nanjing 210094, China*

Corresponding to:

\*E-mail address: [tanguodong@njut.edu.cn](mailto:tanguodong@njut.edu.cn) (Guodong Tang)

## Lorenz number calculation in details:

In general, the total ( $\kappa$ ) consists of the electronic thermal conductivity ( $\kappa_e$ ) and lattice thermal conductivity ( $\kappa_L$ ). The electronic part  $\kappa_e$  is directly proportional to the electrical conductivity  $\sigma$  through the Wiedemann-Franz relation,  $\kappa_e = L\sigma T$ , where  $L$  is Lorenz number and its value is calculated by SPB model. The Lorenz number can be given as:<sup>1,2</sup>

$$L = \frac{k_B^2}{e^2} \left( \frac{(r+3)F_{r+2}(\eta)}{(r+1)F_r(\eta)} - \left[ \frac{(r+2)F_{r+1}(\eta)}{(r+1)F_r(\eta)} \right]^2 \right) \quad (1)$$

For the Lorenz number calculation, we should get reduced Fermi energy  $\eta$  firstly.

The calculation of  $\eta$  can be derived from the measured Seebeck coefficients by using the following relationship:

$$S = \pm \frac{k_B}{e} \left( \eta - \frac{(r+2)F_{r+1}(\eta)}{(r+1)F_r(\eta)} \right) \quad (2)$$

where  $F_n(\eta)$  is the  $n$ -th order Fermi integral,

$$F_n(\eta) = \int_0^{\infty} \frac{\chi^n}{1 + e^{\chi - \eta}} d\chi \quad (3)$$

where  $e$  is the electron charge,  $k_B$  is the Boltzmann constant,  $h$  is the Planck constant,  $r$  is the scattering factor. Here,  $r$  is 0 since acoustic phonon scattering has been assumed as the main carrier scattering mechanism near room temperature (RT). Lorenz number can be obtained by combining equations (1), (2) and (3).

**Table S1** Lattice parameters for pure SnSe and Sn<sub>0.99-x</sub>Zn<sub>0.01</sub>Ga<sub>x</sub>Se (x=0, 0.01, 0.02, 0.03)

| <b>Compositions</b> | <b>a (Å)</b> | <b>b (Å)</b> | <b>c (Å)</b> | <b>Volume (Å<sup>3</sup>)</b> |
|---------------------|--------------|--------------|--------------|-------------------------------|
| SnSe                | 11.52915     | 4.16209      | 4.4541       | 213.73                        |
| x=0                 | 11.52929     | 4.16298      | 4.4453       | 213.36                        |
| x=0.01              | 11.52172     | 4.16063      | 4.4441       | 213.04                        |
| x=0.02              | 11.52114     | 4.16419      | 4.43738      | 212.89                        |
| x=0.03              | 11.51765     | 4.16224      | 4.4372       | 212.72                        |

**Table S2** The calculated and measured densities for pure SnSe and  $\text{Sn}_{0.99-x}\text{Zn}_{0.01}\text{Ga}_x\text{Se}$ 

(x=0, 0.01, 0.02, 0.03)

| <b>Compositions</b> | <b>Theoretical Density</b>                   | <b>Actual Density</b>                        | <b>Density</b> |
|---------------------|----------------------------------------------|----------------------------------------------|----------------|
|                     | <b>(<math>\rho</math>, g/cm<sup>3</sup>)</b> | <b>(<math>\rho</math>, g/cm<sup>3</sup>)</b> | <b>%</b>       |
| SnSe                | 6.190                                        | 6.03                                         | 97.4           |
| x=0                 | 6.181                                        | 5.96                                         | 96.4           |
| x=0.01              | 6.163                                        | 5.87                                         | 95.2           |
| x=0.02              | 6.145                                        | 5.82                                         | 94.7           |
| x=0.03              | 6.127                                        | 5.8                                          | 94.7           |

**Figure S1**  $\text{Sn}_{0.96}\text{Zn}_{0.01}\text{Ga}_{0.03}\text{Se}$  temperature dependent (a) total thermal conductivity( $\kappa_T$ ), (b) lattice thermal conductivity( $\kappa_L$ ), (c) electrical conductivity ( $\sigma$ ), (d) Seebeck coefficient( $S$ ), (e) power factor ( $PF$ ), (f)  $ZT$  for sample parallel to the pressing direction ( $//$ ) and perpendicular to the pressing direction ( $\perp$ ).

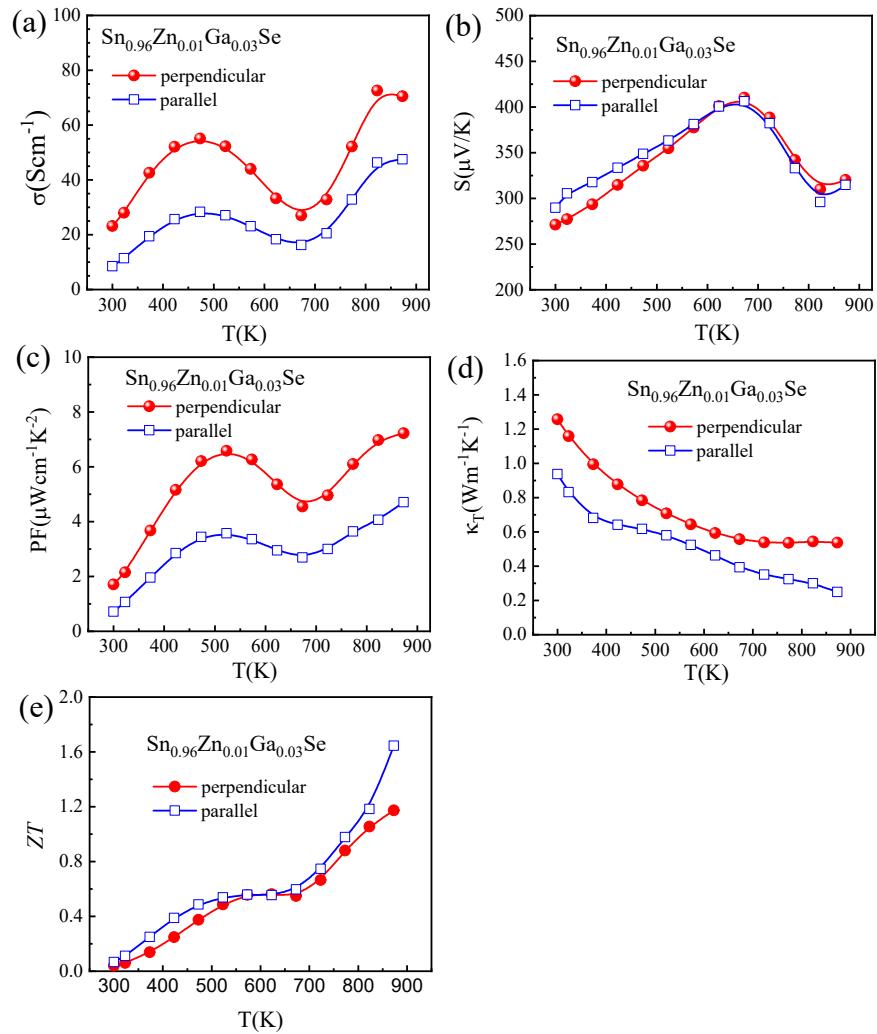

**Figure S2** The thermal diffusivity ( $D$ ) for pure SnSe and  $\text{Sn}_{0.99-x}\text{Zn}_{0.01}\text{Ga}_x\text{Se}$  ( $x=0, 0.01, 0.02, 0.03$ )

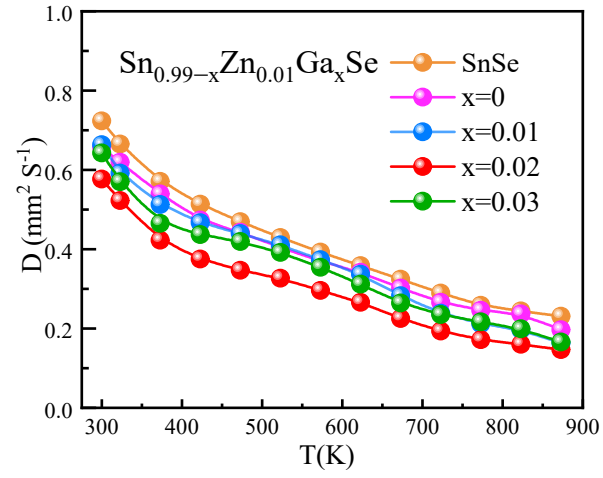

**Figure S3** Comparison of the temperature dependent (a) total thermal conductivity( $\kappa_T$ ) (b)

lattice thermal conductivity( $\kappa_L$ )

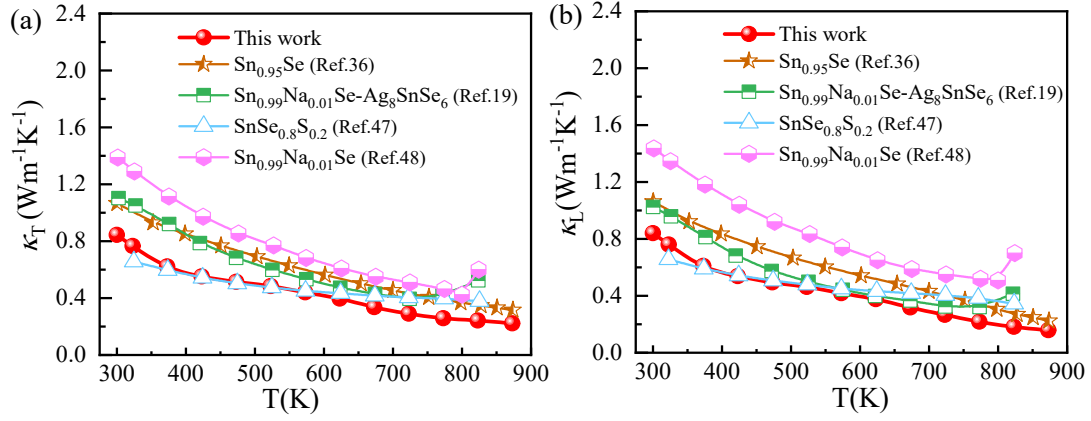

**Figure S4** (a) Lorenz number ( $L$ ) (b) electronic thermal conductivity ( $\kappa_e$ ) as a function of temperature for pure SnSe and  $\text{Sn}_{0.99-x}\text{Zn}_{0.01}\text{Ga}_x\text{Se}$  ( $x=0, 0.01, 0.02, 0.03$ )

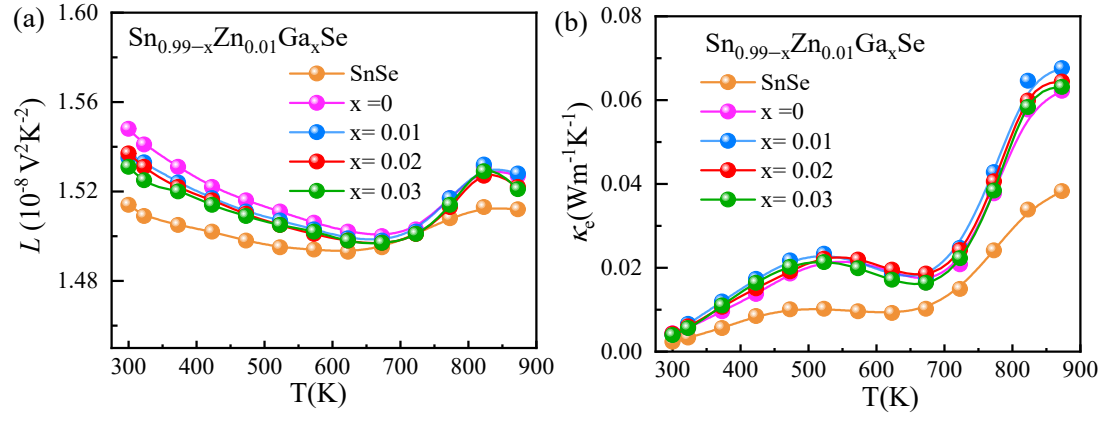



**Figure S5** SEM image of as-synthesized  $\text{Sn}_{0.99}\text{Zn}_{0.01}\text{Se}$  powder sample.

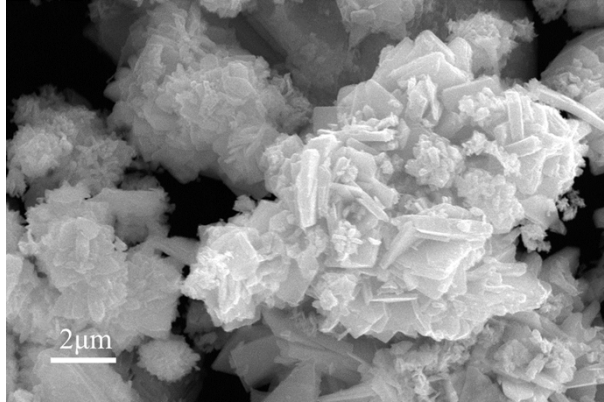

**Figure S6** Energy Dispersive Spectrometer (EDS) elemental mapping image for

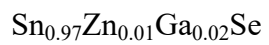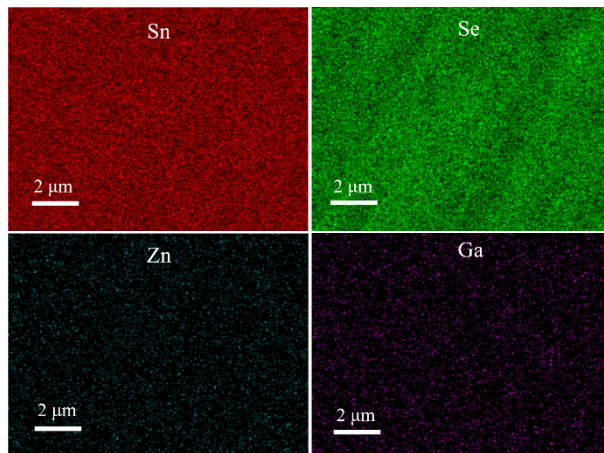

## Reference

- [1] W. G. Zeier; A. LaLonde; Z. M. Gibbs; C. P. Heinrich; M. Panthöfer; G. J. Snyder; W. Tremel, *J. Am. Chem. Soc.* **2012**, *134*, 7147-7154.
- [2] A. F. May; E. S. Toberer; A. Saramat; G. J. Snyder, *Phys. Rev. B* **2009**, *80*, 125205.
